# Supplementary material for: Factors Associated With Increased Collection of Patient-Reported Outcomes Within a Large Health Care System
Source: PubMed Central journal article supplement (PMC7156989; doi:10.1001/jamanetworkopen.2020.2764), 2020-04-14
Supplement: jamanetwopen-3-e202764-s001.pdf [file jamanetwopen-3-e202764-s001.pdf]

## Supplementary Online Content

Sisodia RC, Dankers C, Orav J, et al. Factors associated with increased collection of patient-reported outcomes within a large health care system. *JAMA Netw Open*. 2020;3(4):e202764. doi:10.1001/jamanetworkopen.2020.2764

**eTable.** Included Clinics in Partners Healthcare System Collecting Patient-Reported Outcomes

This supplementary material has been provided by the authors to give readers additional information about their work.

**eTable.** Included Clinics in Partners Healthcare System Collecting Patient-Reported Outcomes

| Type of Clinic                                 | Number of Clinics | % of Total Clinics collecting PROs within the Enterprise (n=205) | Number of Questionnaire sets collected by clinic | % of Total Questionnaire sets collected within the Enterprise (n=745,028) |
|------------------------------------------------|-------------------|------------------------------------------------------------------|--------------------------------------------------|---------------------------------------------------------------------------|
| <b>Medical &amp; Behavioral Health Clinics</b> |                   |                                                                  |                                                  |                                                                           |
| Internal Medicine                              | 32                | 15.6%                                                            | 112,123                                          | 15.0%                                                                     |
| Oncology                                       | 32                | 15.6%                                                            | 104,344                                          | 14.0%                                                                     |
| Pediatrics                                     | 15                | 7.3%                                                             | 83,532                                           | 11.2%                                                                     |
| Family Medicine                                | 16                | 7.8%                                                             | 49,994                                           | 6.7%                                                                      |
| Psychiatry and Behavioral Medicine             | 16                | 7.8%                                                             | 31,403                                           | 5.0%                                                                      |
| Neurology                                      | 11                | 5.3%                                                             | 28,311                                           | 3.8%                                                                      |
| Physical Medicine & Rehabilitation             | 5                 | 2.4%                                                             | 26,759                                           | 3.6%                                                                      |
| Cardiology                                     | 3                 | 1.5%                                                             | 17,955                                           | 2.4%                                                                      |
| Adolescent Medicine                            | 2                 | 1%                                                               | 775                                              | <1%                                                                       |
| Allergy/Immunology                             | 2                 | 1%                                                               | 1,806                                            | <1%                                                                       |
| Dermatology                                    | 2                 | 1%                                                               | 623                                              | <1%                                                                       |
| Endocrinology                                  | 2                 | 1%                                                               | 47                                               | <1%                                                                       |
| Gastroenterology                               | 1                 | 0.5%                                                             | 1,873                                            | <1%                                                                       |
| Genetics                                       | 2                 | 1%                                                               | 337                                              | <1%                                                                       |
| Infectious Disease                             | 1                 | 0.5%                                                             | 314                                              | <1%                                                                       |
| Infusion                                       | 5                 | 2.4%                                                             | 1,959                                            | <1%                                                                       |
| Integrative Medicine                           | 1                 | 0.5%                                                             | 3,947                                            | <1%                                                                       |
| Nephrology                                     | 2                 | 1%                                                               | 1,268                                            | <1%                                                                       |

|                                   |    |      |         |       |
|-----------------------------------|----|------|---------|-------|
| Obstetrics                        | 1  | 0.5% | 3,181   | <1%   |
| Occupational Therapy              | 3  | 1.5% | 302     | <1%   |
| Palliative Care                   | 2  | 1%   | 384     | <1%   |
|                                   |    |      |         |       |
| Pediatric Endocrinology           | 2  | 1%   | 668     | <1%   |
| Pediatric Gastroenterology        | 2  | 1%   | 444     | <1%   |
| Pain Medicine                     | 3  | 1.5% | 5,967   | <1%   |
| Physical Therapy                  | 5  | 2.4% | 3,915   | <1%   |
| Psychiatry (Child and Adolescent) | 1  | 0.5% | 3,063   | <1%   |
| Rheumatology                      | 2  | 1%   | 6,021   | <1%   |
| Sleep Medicine                    | 1  | 0.5% | 2,017   | <1%   |
| <b><i>Surgical Clinics</i></b>    |    |      |         |       |
| Orthopedics                       | 18 | 8.7% | 129,069 | 17.3% |
| Neurosurgery                      | 6  | 2.9% | 57,428  | 7.7%  |
| Urology                           | 2  | 1%   | 44,051  | 5.9%  |
| Hand Surgery                      | 1  | 0.5% | 15,645  | 2.1%  |
| Bariatric Surgery                 | 1  | 0.5% | 567     | <1%   |
| Burn Surgery                      | 1  | 0.5% | 206     | <1%   |
| Cardiac Surgery                   | 1  | 0.5% | 1,380   | <1%   |
| Pediatric Orthopedics             | 1  | 0.5% | 517     | <1%   |
| Podiatry                          | 1  | 0.5% | 1,418   | <1%   |
| Vascular Surgery                  | 1  | 0.5% | 1,415   | <1%   |
